# Supplementary material for: ZmGRAS46 Negatively Regulates Flowering Time in Arabidopsis thaliana
Source: MDPI journal article supplement (doi:10.3390/agronomy14010155), 2024-01-10
Supplement: s1 [file s1]

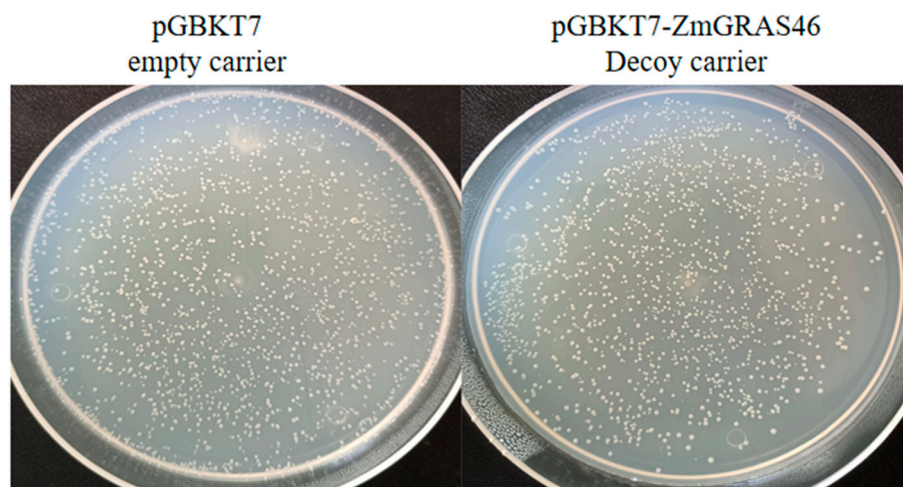

Supplementary Figure S1 Toxicity validation of pGBKT7-ZmGRAS46 prey vector

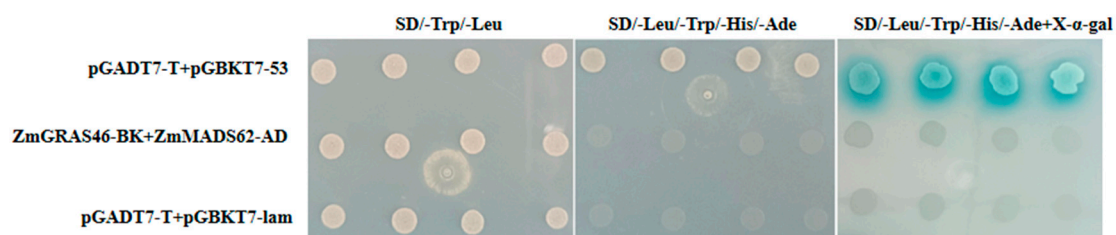

Supplementary Figure S2 Validation of pGBKT7-ZmGRAS46 prey vector self-activation

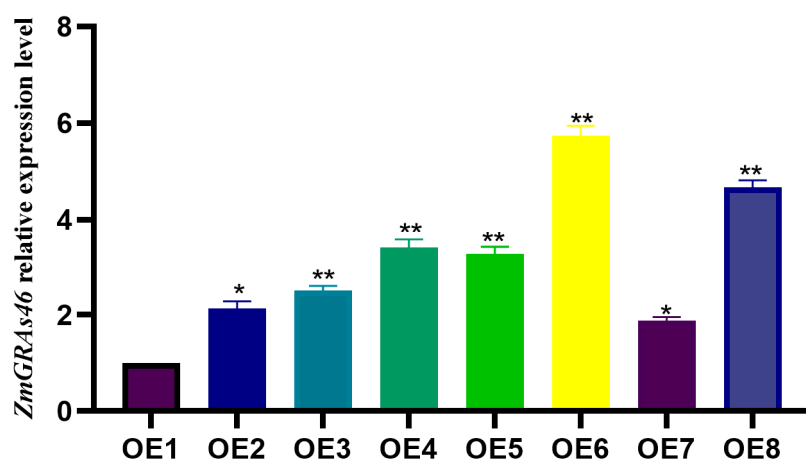

Supplementary Figure S3 Analysis of relative expression of ZmGRAS46 in eight T3 generation positive overexpressing Arabidopsis thaliana plants

**Supplementary Table S1** All primer sequences used in this study

| Primer name    | primer sequence(5'→3')                          |
|----------------|-------------------------------------------------|
| ZmGRAS46-F     | GGCACCTAGCCGCCCTCTC                             |
| ZmGRAS46-R     | ACCGAAGGAATTTACAGTAAAGTAG                       |
| ZmGRAS46-3301F | actcttgaccatggtagatctGGCACCTAGCCGCCCTCTC        |
| ZmGRAS46-3301R | ggggaaattcgagctggtcaccACCGAAGGAATTTACAGTAAAGTAG |
| ZmGRAS46-BKF   | ATGGCCATGGAGGCCGAATTCGGCACCTAGCCGCCCTCTC        |
| ZmGRAS46-BKR   | CCGCTGCAGGTCGACGGATCCACCGAAGGAATTTACAGTAAAGTAG  |
| ZmMADS62-ADF   | GCCATGGAGGCCAGTGAATTCTCGCCAGGTGCCGATCTC         |
| ZmMADS62-ADR   | CAGCTCGAGCTCGATGGATCCTGCCTAAGCAACACCAAATGAA     |
| q-AtActin2-F   | CACTGTGCCAATCTACGAGGGT                          |
| q-AtActin2-R   | CACAAACGAGGGCTGGAACAAG                          |
| q-ZmGRAS46-F   | CACTCTGCTGACCGCTTGAC                            |
| q-ZmGRAS46-R   | TCACGTCGTCGAGAACAGGAT                           |
| q-AtGA20ox1-F  | GGGCTAAGTTTAGGCGT                               |
| q-AtGA20ox1-R  | GGTGGCGTCACTACTC                                |
| q-AtGA20ox2-F  | TCCAACGATAATAGTGGCT                             |
| q-AtGA20ox2-R  | TTGGCATGGAGGATAATGA                             |
| q-AtGA3ox1-F   | CCATTACCTCCCACACTCT                             |
| q-AtGA3ox1-R   | GCCAGTGATGGTGAAACCTT                            |
| q-AtGA3ox2-F   | TGGTCCGAAGGTTTCAC                               |
| q-AtGA3ox2-R   | GGGTCGAGTCTGTATGG                               |
| q-AtGA2ox1-F   | TGAGGACGAGAGGTTGTACGA                           |
| q-AtGA2ox1-R   | TCCTTTCGAATTGTTGAAGCC                           |
| q-AtGA2ox2-F   | TGGAAGTTGGGTCGCT                                |
| q-AtGA2ox2-R   | GACAAGGCATGGCAAT                                |
| q-AtCO-F       | CCGGGTCTGCGAGTCATG                              |
| q-AtCO-R       | GGCATCATCTGCCTCACACA                            |
| q-AtFT-F       | CCCTGCTACAACTGGAACAAC                           |
| q-AtFT-R       | CACCCTGGTGCATACACTG                             |
| q-AtSOC1-F     | AGCTGCAGAAAACGAGAAGCT                           |
| q-AtSOC1-R     | GGGCTACTCTCTTCATCACCT                           |
| q-AtLFY-F      | TTAGAGCTGAACGGAGACGATT                          |
| q-AtLFY-R      | TCTTCATCTTTCCTTGACCTGC                          |
